# Supplementary material for: Molecular evidence of Zn chelation of the procaspase activating compound B-PAC-1 in B cell lymphoma
Source: PubMed Central journal article supplement (PMC4823120; doi:10.18632/oncotarget.6505), 2015-12-07
Supplement: oncotarget-07-3461-s001.pdf [file oncotarget-07-3461-s001.pdf]

## SUPPLEMENTARY FIGURES AND TABLES

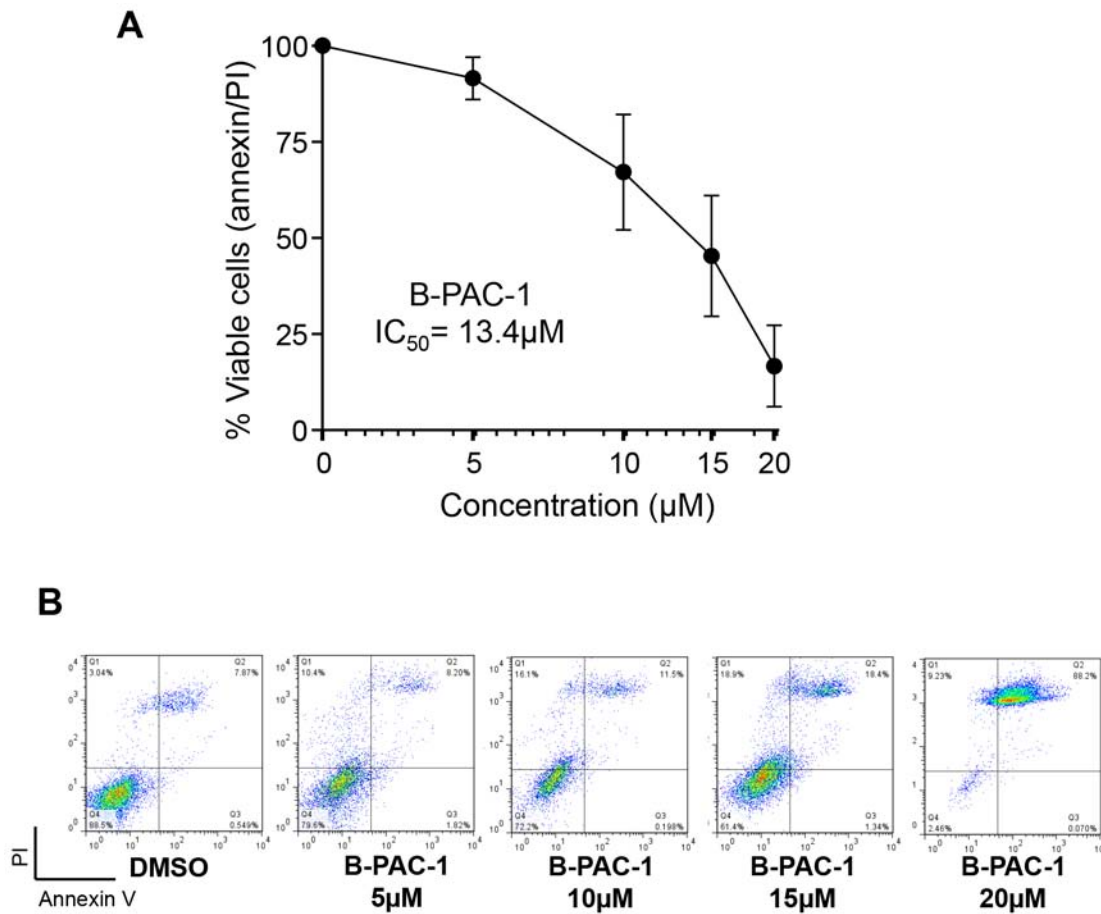

**Supplementary Figure S1: A. Dose dependent cell death by B-PAC-1 in MEF cells stably over-expressed with WT Casp3 construct.  $0.5 \times 10^6$  cells were treated with 5, 10, 15 or 20 µM B-PAC-1 for 24 hr. Cells were harvested and stained with Annexin V and PI and the amount of apoptosis was measured compared with DMSO control. Mean  $\pm$  SE ( $n = 7$ ); IC<sub>50</sub> value was determined as shown in the inset (13.4 µM). B. Representative Annexin V-PI FACS analysis showing dose dependent induction of apoptosis induced by B-PAC-1**

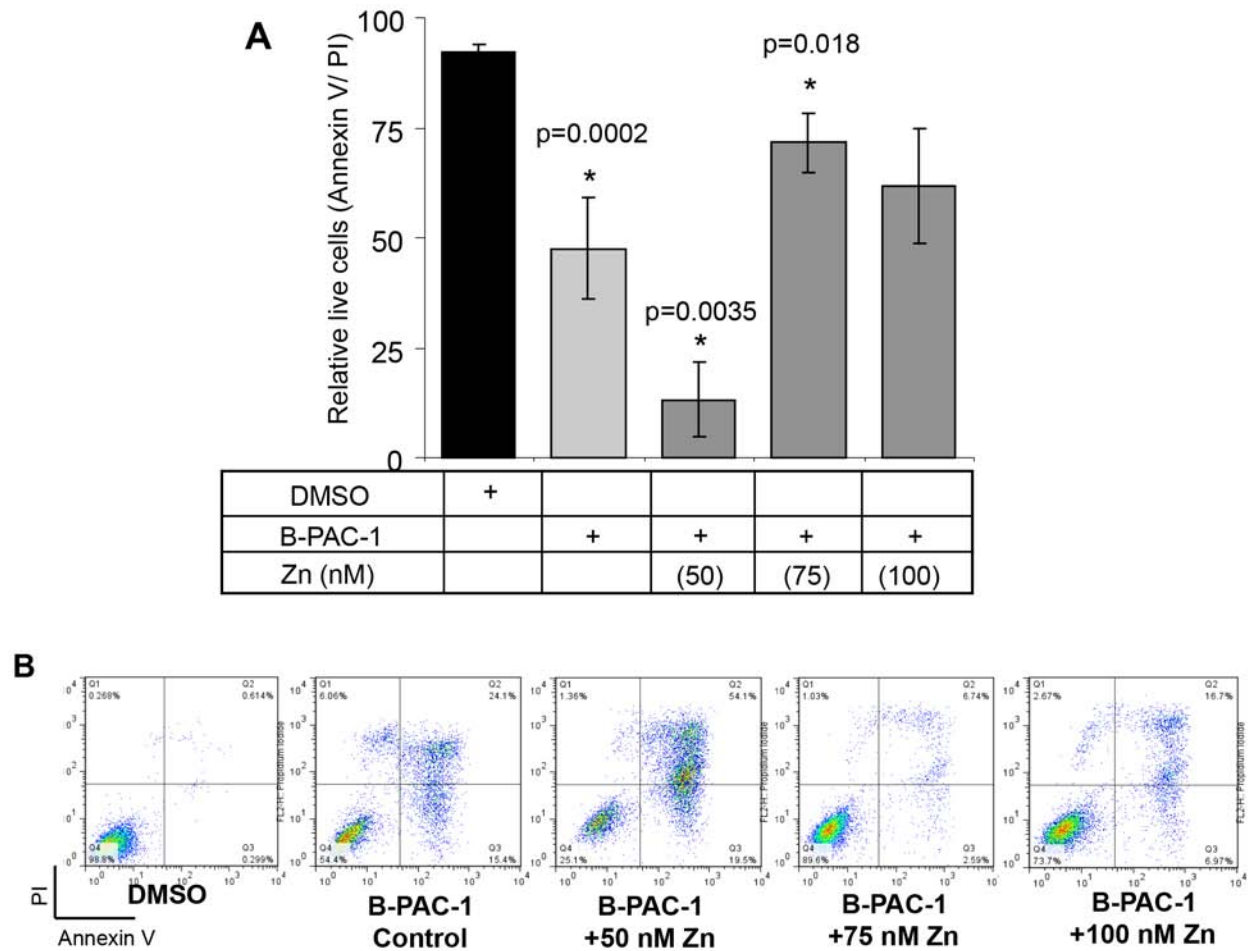

**Supplementary Figure S2: A. Dose dependent inhibition of B-PAC-1 induced apoptosis of WT Casp3 expressing MEF cells by exogenous Zn.** Stably over-expressed WT Casp3 ( $0.5 \times 10^6$ /well) MEF cells were treated with  $15 \mu\text{M}$  B-PAC-1 either alone or in combination with Zn in the indicated amount for 24 hr. Cell were harvested and stained with Annexin V and PI and the amount of apoptosis was measured. Mean  $\pm$  SE ( $n = 5$ ); \*significant difference from DMSO treated cells. Maximum protection was calculated as 90 nM of Zn. **B.** Representative Annexin V-PI FACS analysis showing dose dependent Zn inhibition of apoptosis induced by B-PAC-1.

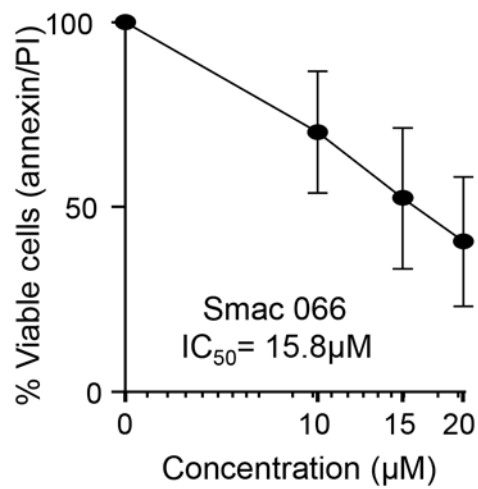

**Supplementary Figure S3: Dose dependent cell death by 066 in MEF cells stably over-expressed with WT Casp3.  $0.5 \times 10^6$  cells were treated with 10, 15 or 20  $\mu\text{M}$  066 for 24 hr. Cells were harvested and stained with Annexin V and PI and the amount of apoptosis was measured compared with DMSO control. Mean  $\pm$  SE ( $n = 5$ );  $\text{IC}_{50}$  value was determined as shown in the inset (15.8  $\mu\text{M}$ )**

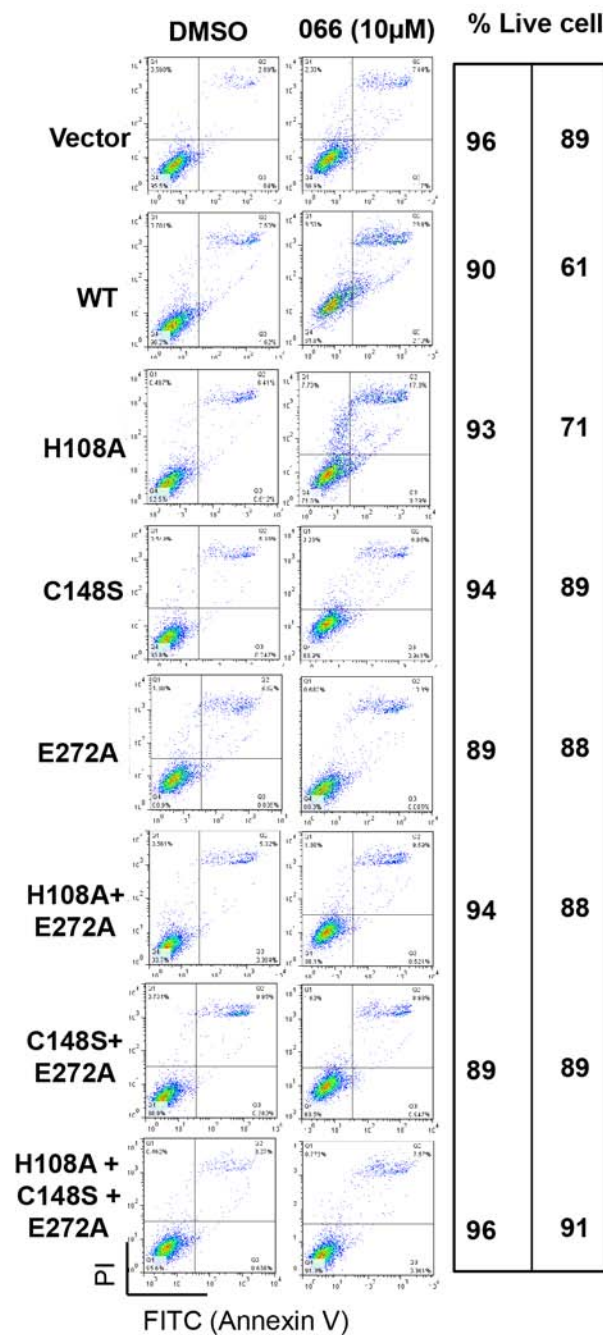

**Supplementary Figure S4: Representative Annexin V-PI FACS analysis of smac mimetic 066 induced cell death.** MEF cells stably over-expressed with indicated plasmids were seeded into 6 well plate ( $0.5 \pm 10^6$ /well) and treated with 10 µM 066 for 24 hr. Cells were harvested and stained with Annexin V and PI and the amount of apoptosis was measured

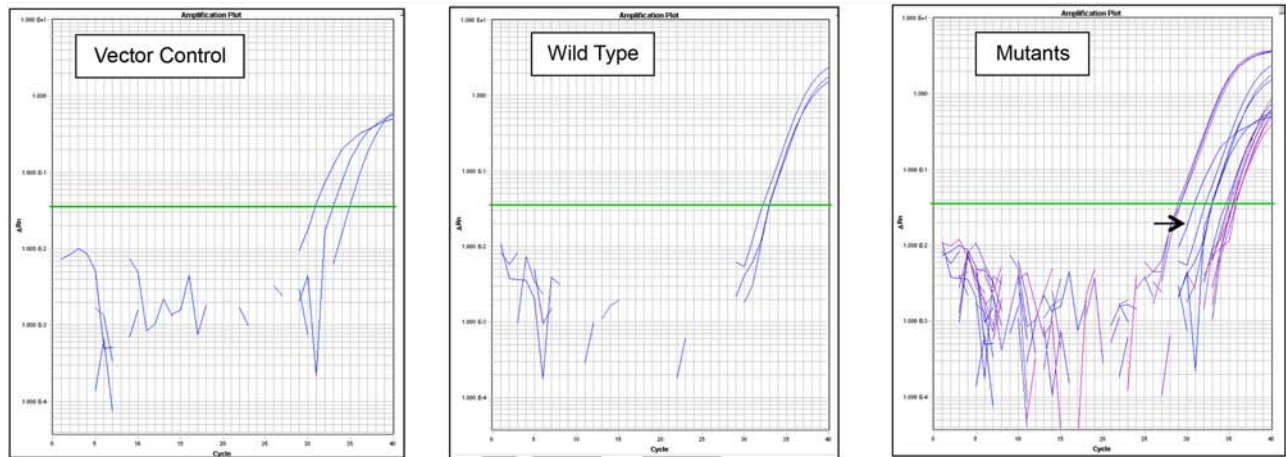

**Supplementary Figure S5: qRT-PCR expression of Casp3 in vector control, WT and Zn-Casp3 mutant MEFs.** Representative snapshot of results of SDS 2.3 software showing amplification curve. Black arrow showed the amplification curves of vector control compared to other MEFs

Supplementary Table S1: List of antibodies and reagents used.

| Antibodies/reagents                               | Source and Catalog #          |
|---------------------------------------------------|-------------------------------|
| Casp3                                             | Cell Signaling, 9665          |
| Casp9                                             | Cell Signaling, 9502          |
| Casp6                                             | Cell Signaling, 9762          |
| Casp7                                             | Cell Signaling, 9492          |
| cIAP2                                             | Epitomics, S2700              |
| cIAP1                                             | Abcam, ab2399                 |
| Mcl-1                                             | Santa Cruz, S-19              |
| ATM                                               | EMD Millipore, PC116          |
| Smac (DIABLO)                                     | BD Biosciences, 612246        |
| XIAP                                              | BD Biosciences, 610762        |
| Poly (ADP-ribose) polymerase                      | Enzo Life Sciences, BML-SA250 |
| Cleaved Poly (ADP-ribose) polymerase              | Cell Signaling, 9541          |
| Rabbit HA                                         | Bethyl Lab., A190-108P        |
| Mouse FLAG                                        | Sigma-Aldrich, F1804          |
| GAPDH                                             | Sigma-Aldrich, G8795          |
| Staurosporine                                     | LC Laboratories               |
| Bendamustine                                      | Selleckchem                   |
| MK2206                                            | Selleckchem                   |
| ABT199                                            | Xcessbio, CA                  |
| Annexin V fluorescein isothiocyanate (FITC),      | BD Biosciences                |
| Hoechst 33258                                     | Invitrogen                    |
| Zinc sulfate heptahydrate (Zn. 7H <sub>2</sub> O) | Sigma-Aldrich                 |
| Geneticin® (G418 Sulfate) (50 mg/mL)              | Life Technologies (10131-035) |
| FuGENE6                                           | Promega Inc                   |
| cycloheximide                                     | Sigma-Aldrich                 |
